# Supplementary material
Source: MDPI journal article supplement (https://www.mdpi.com/2079-6412/14/2/191)
Supplement: s1 [file s1 › coatings-2847226-supplementary.pdf]

# Improving Optical and Electrical Characteristics of GaN Films via 3D Island to 2D Growth Mode Transition Using Molecular Beam Epitaxy

## Supplementary Materials

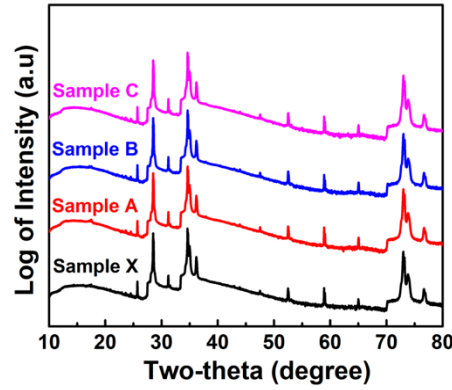

Figure S1: The 2-theta diffraction patterns of MBE-grown GaN films and the MOCVD GaN/Si template.

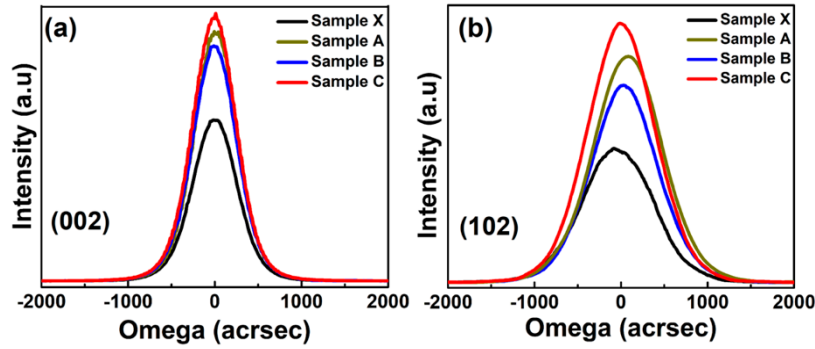

Figure S2: X-ray rocking curves of all GaN films scanned on (a) (002) and (b) (102) reflections.
